# Supplementary material for: Stromal miR-20a controls paracrine CXCL8 secretion in colitis and colon cancer
Source: PubMed Central journal article supplement (PMC5849194; doi:10.18632/oncotarget.24495), 2018-02-14
Supplement: oncotarget-09-13048-s001.pdf [file oncotarget-09-13048-s001.pdf]

## Stromal *miR-20a* controls paracrine CXCL8 secretion in colitis and colon cancer

### SUPPLEMENTARY MATERIALS

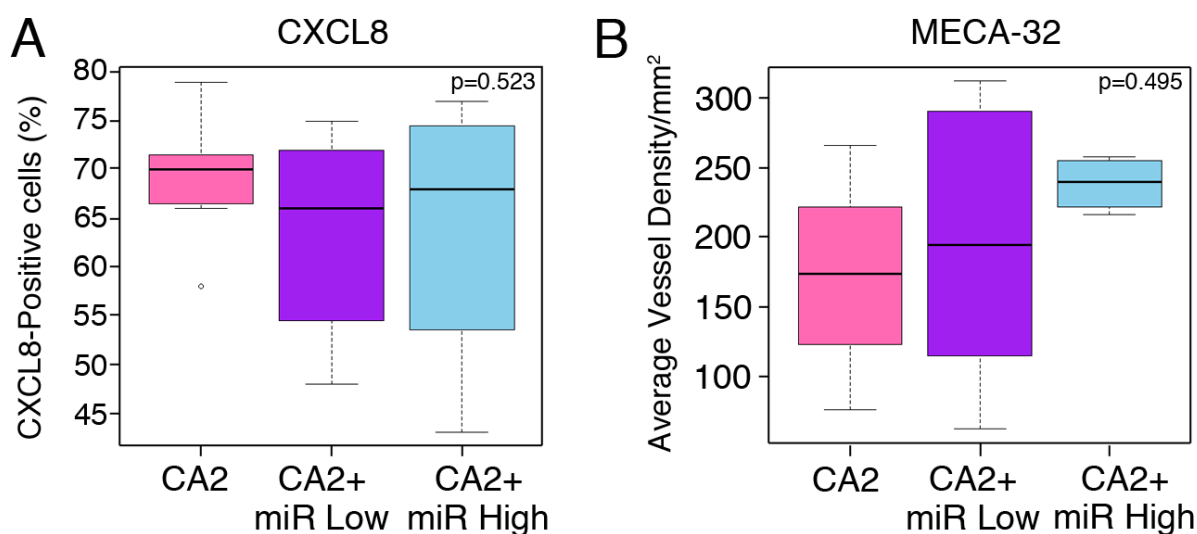

**Supplementary Figure 1: Quantification of CXCL8 and MECA-32 immunohistochemistry of xenograft tumors.** Quantification of CXCL8 (A) and MECA-32 (B) immunostaining of harvested co-inoculation xenografts consisting of cancer stem cells (CA2) with either *miR-20a*<sup>high</sup> or *miR-20a*<sup>low</sup> colitis-derived fibroblasts. Statistics were performed using ANOVA and significance levels are indicated in the individual panels. Each group contained  $n \geq 9$  animals.

**Supplementary Table 1: Patient demographics**

| Patient ID | Disease                           | Pathology (overall)                                     | M/F | Race  | Disease Duration (Years) | Age at resection |
|------------|-----------------------------------|---------------------------------------------------------|-----|-------|--------------------------|------------------|
| NL 23      | Colon cancer                      | Normal Margin                                           | F   | White | NA                       | Unknown          |
| NL 33      | Colon cancer                      | Normal Margin                                           | M   | White | NA                       | Unknown          |
| NL 46      | Colon cancer                      | Normal Margin                                           | F   | White | NA                       | 63               |
| NL 47      | Colon cancer                      | Normal Margin                                           | M   | White | NA                       | 72               |
| CT 4       | Colitis                           | Colitis and Rectal Cancer                               | M   | White | 13                       | 36               |
| CT 5       | Colitis                           | Colitis                                                 | M   | White | 2                        | 20               |
| CT 6       | Colitis                           | Colitis                                                 | F   | White | 1                        | 59               |
| CT 9       | Colitis                           | Pancolitis                                              | F   | White | 1                        | 30               |
| CT 35      | Colitis                           | Pancolitis                                              | F   | White | 30                       | 47               |
| CT 37      | Colitis                           | Chronic active colitis                                  | M   | White | Unknown                  | 36               |
| CT 38      | Colitis                           | Indeterminate colitis                                   | F   | White | 2                        | 64               |
| CT 39      | Colitis                           | Diffuse Colitis                                         | M   | White | 7                        | 57               |
| CT 40      | Colitis                           | Diffuse Pancolitis                                      | M   | White | 2                        | 32               |
| CT 42      | Colitis                           | Diffuse chronic active colitis                          | F   | White | 3                        | 49               |
| CT 43      | Colitis with high-grade dysplasia | Diffuse chronic active colitis with low-grade dysplasia | M   | Asian | 10                       | 53               |
| CA 6       | Colon Cancer                      | Stage 2                                                 | M   | White | NA                       | Unknown          |
| CA 19      | Colon Cancer                      | Stage 1                                                 | F   | White | NA                       | 62               |
| CA 21      | Rectal Cancer                     | Stage 2                                                 | M   | White | NA                       | Unknown          |
| CA 22      | Colon Cancer                      | Stage 3                                                 | M   | White | NA                       | Unknown          |
| CA 44      | Colon cancer                      | Stage 1                                                 | F   | White | NA                       | 30               |

**Supplementary Table 2: Short-tandem Repeat fingerprinting**

| Sample Name | D13S317 | D16S539 | CSF1PO | TH01   | vWA    | D21S11   | D7S820 | D5S818 | TPOX  | Amelogenin |
|-------------|---------|---------|--------|--------|--------|----------|--------|--------|-------|------------|
| CT6 Fb      | 11, 12  | 11, 12  | 12     | 6, 8   | 14, 16 | 28, 30   | 8, 11  | 11, 12 | 8, 9  | X, Y       |
| CT42        | 11, 13  | 11, 13  | 11, 13 | 7, 9.3 | 18     | 31, 33.2 | 10     | 12     | 8, 9  | X, Y       |
| CRL1459     | 12      | 12      | 8      | 6, 7   | 15, 17 | 29, 30   | 8      | 12     | 8, 11 | X, Y       |
| CRL7213     | 11, 12  | 11, 12  | 10, 12 | 8, 9   | 17, 18 | 28, 32.2 | 8, 14  | 11     | 8, 9  | X          |
| CAF58       | 12      | 12      | 10, 12 | 6, 9.3 | 16, 17 | 29, 32.2 | 8, 9   | 11, 12 | 8     | X          |
| 33NL        | 11      | 11      | 11, 12 | 8, 9.3 | 15, 17 | 29, 32.2 | 10, 12 | 9, 11  | 8     | X, Y       |

Unique identities of isolates used in studies were confirmed for the date presented in Figures 3 and 4.

**Supplementary Table 3: Identification of miRNAs regulating the CXCL8 3'UTR.** See Supplementary\_Table\_3
